# Supplementary material
Source: HighWire-hosted journal article supplement (https://fn.bmj.com/content/105/2/172)

# Supplementary material 1. Driver diagram for IFDC care model

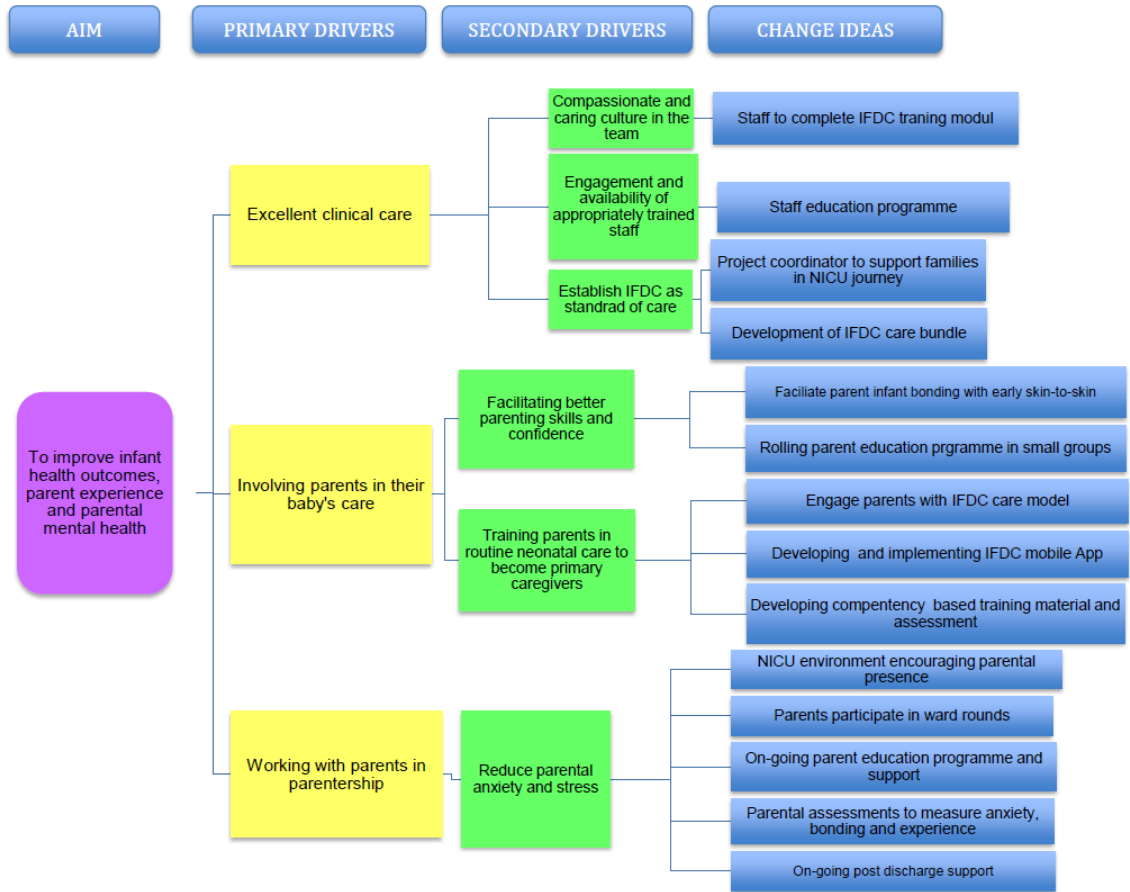

Supplement: inline-supplementary-material-2 [file inline-supplementary-material-2.pdf]
